# Supplementary material for: Comparison of the Opn-CreER and Ck19-CreER Drivers in Bile Ducts of Normal and Injured Mouse Livers
Source: MDPI journal article supplement (doi:10.3390/cells8040380), 2019-04-25
Supplement: s1 [file s1]

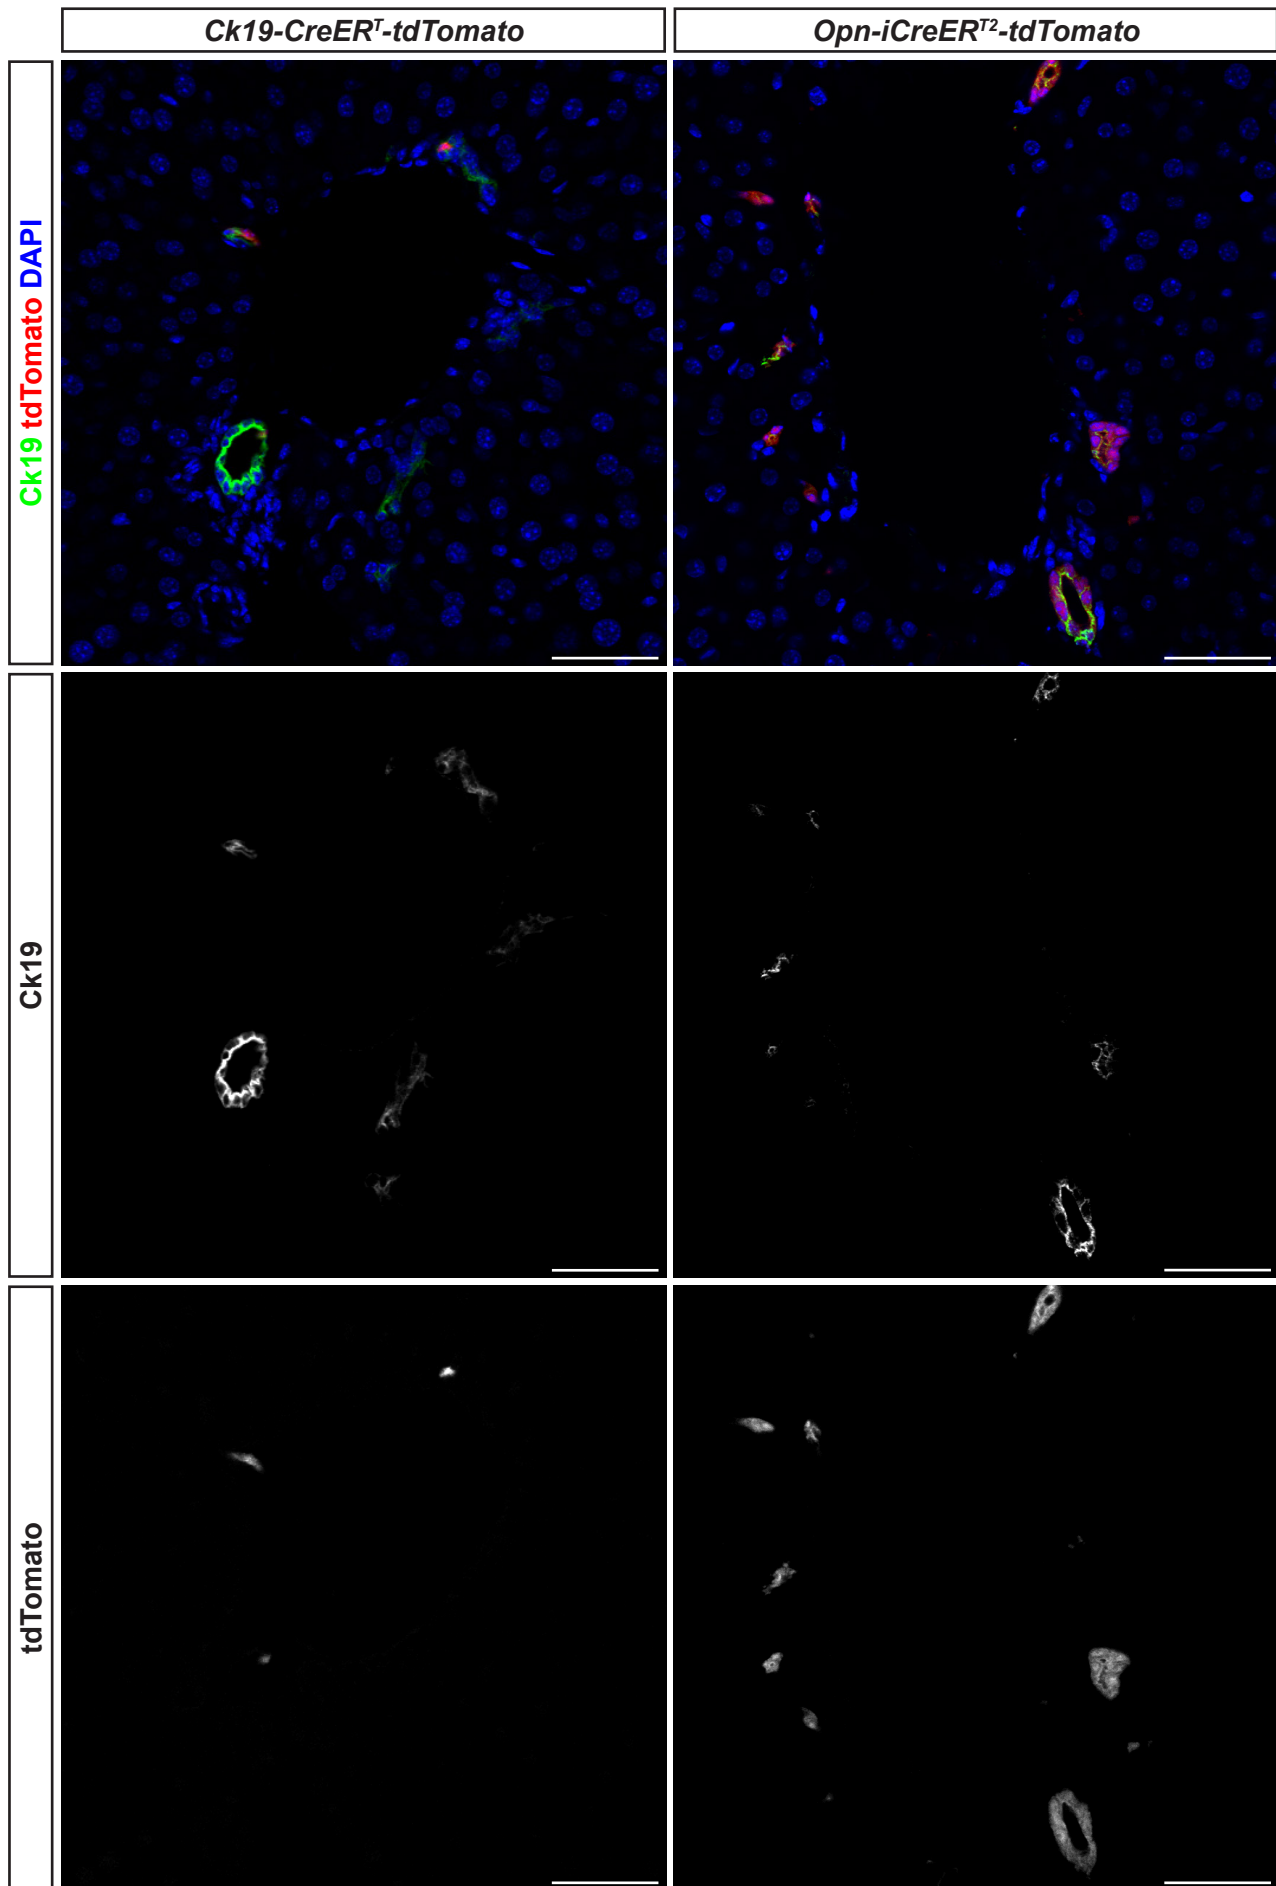

**Figure S1. Troma III Ck19 antibody labels all cholangiocytes.**  
Immunofluorescent detection of Ck19 with tdTomato in *Ck19-CreER-tdTomato* and *Opn-CreER-tdTomato* mice. One portal region is shown. Scale bars: 50  $\mu$ m.
