# Supplementary material for: Comparison of the Opn-CreER and Ck19-CreER Drivers in Bile Ducts of Normal and Injured Mouse Livers
Source: MDPI journal article supplement (doi:10.3390/cells8040380), 2019-04-25
Supplement: s1 [file s1]

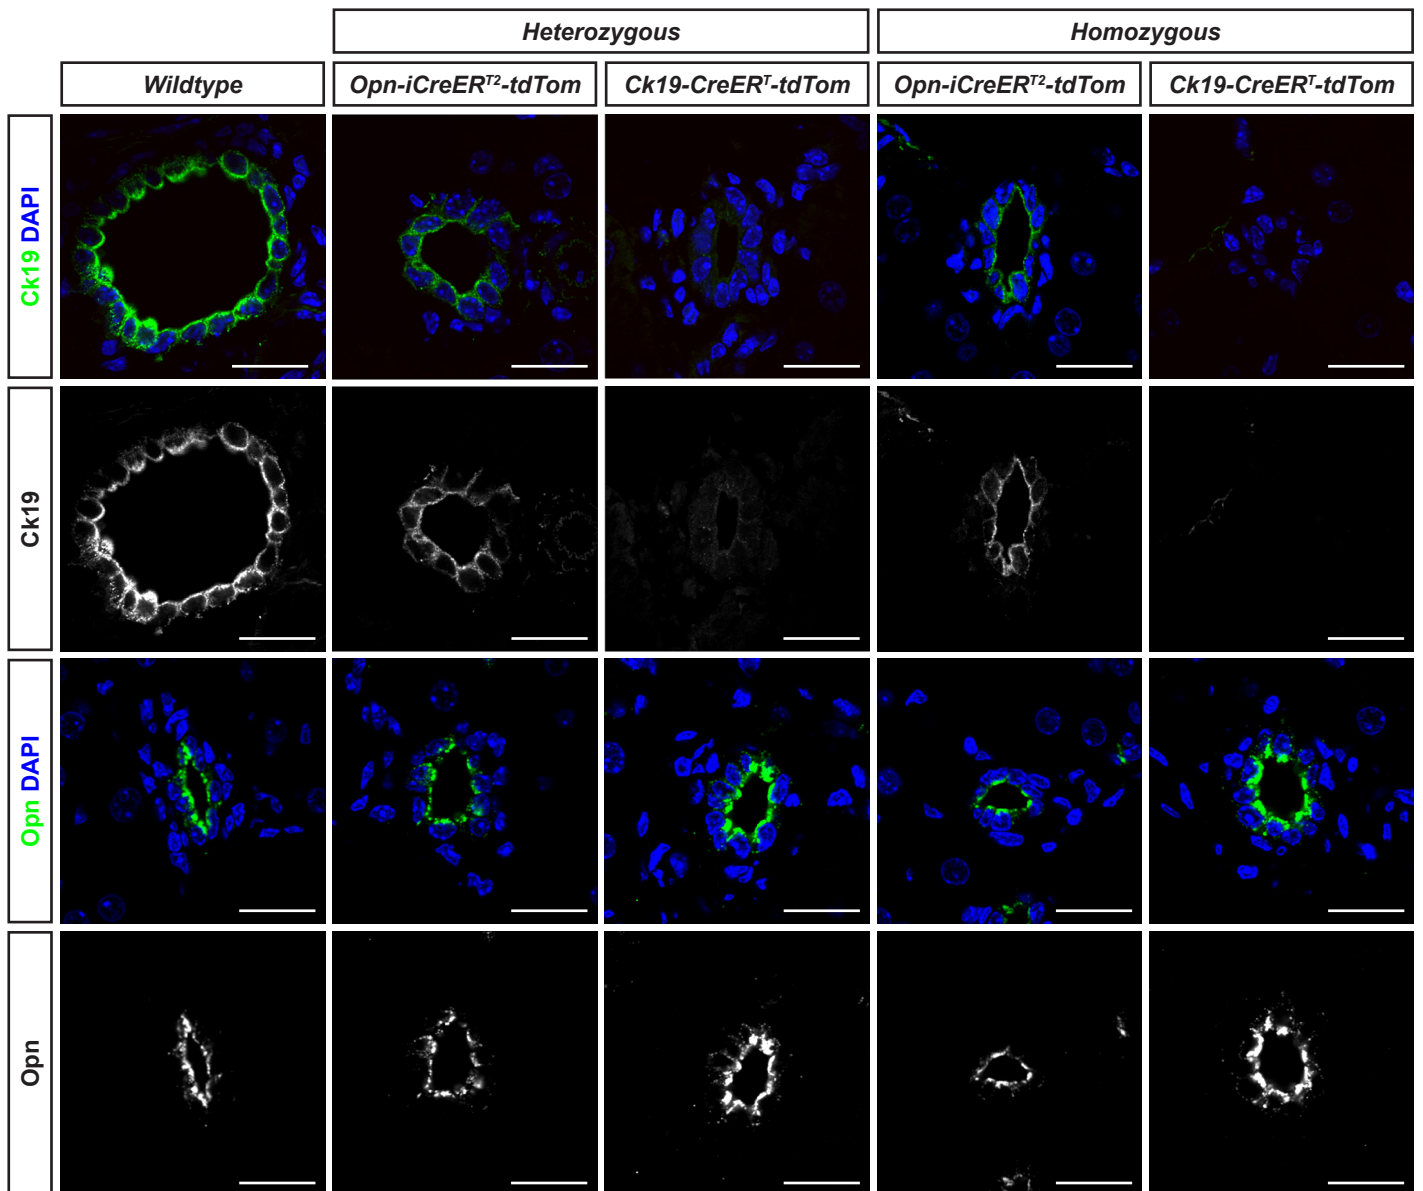

**Figure S2. Ck19 expression is abrogated in homozygous *Ck19-CreER-tdTomato* mice.** Immunofluorescent detection of Ck19 and Opn in heterozygous and homozygous *Ck19-CreER-tdTomato* and *Opn-CreER-tdTomato* mice. Scale bars: 20  $\mu$ m.
