# Supplementary material for: Comparison of the Opn-CreER and Ck19-CreER Drivers in Bile Ducts of Normal and Injured Mouse Livers
Source: MDPI journal article supplement (doi:10.3390/cells8040380), 2019-04-25
Supplement: s1 [file s1]

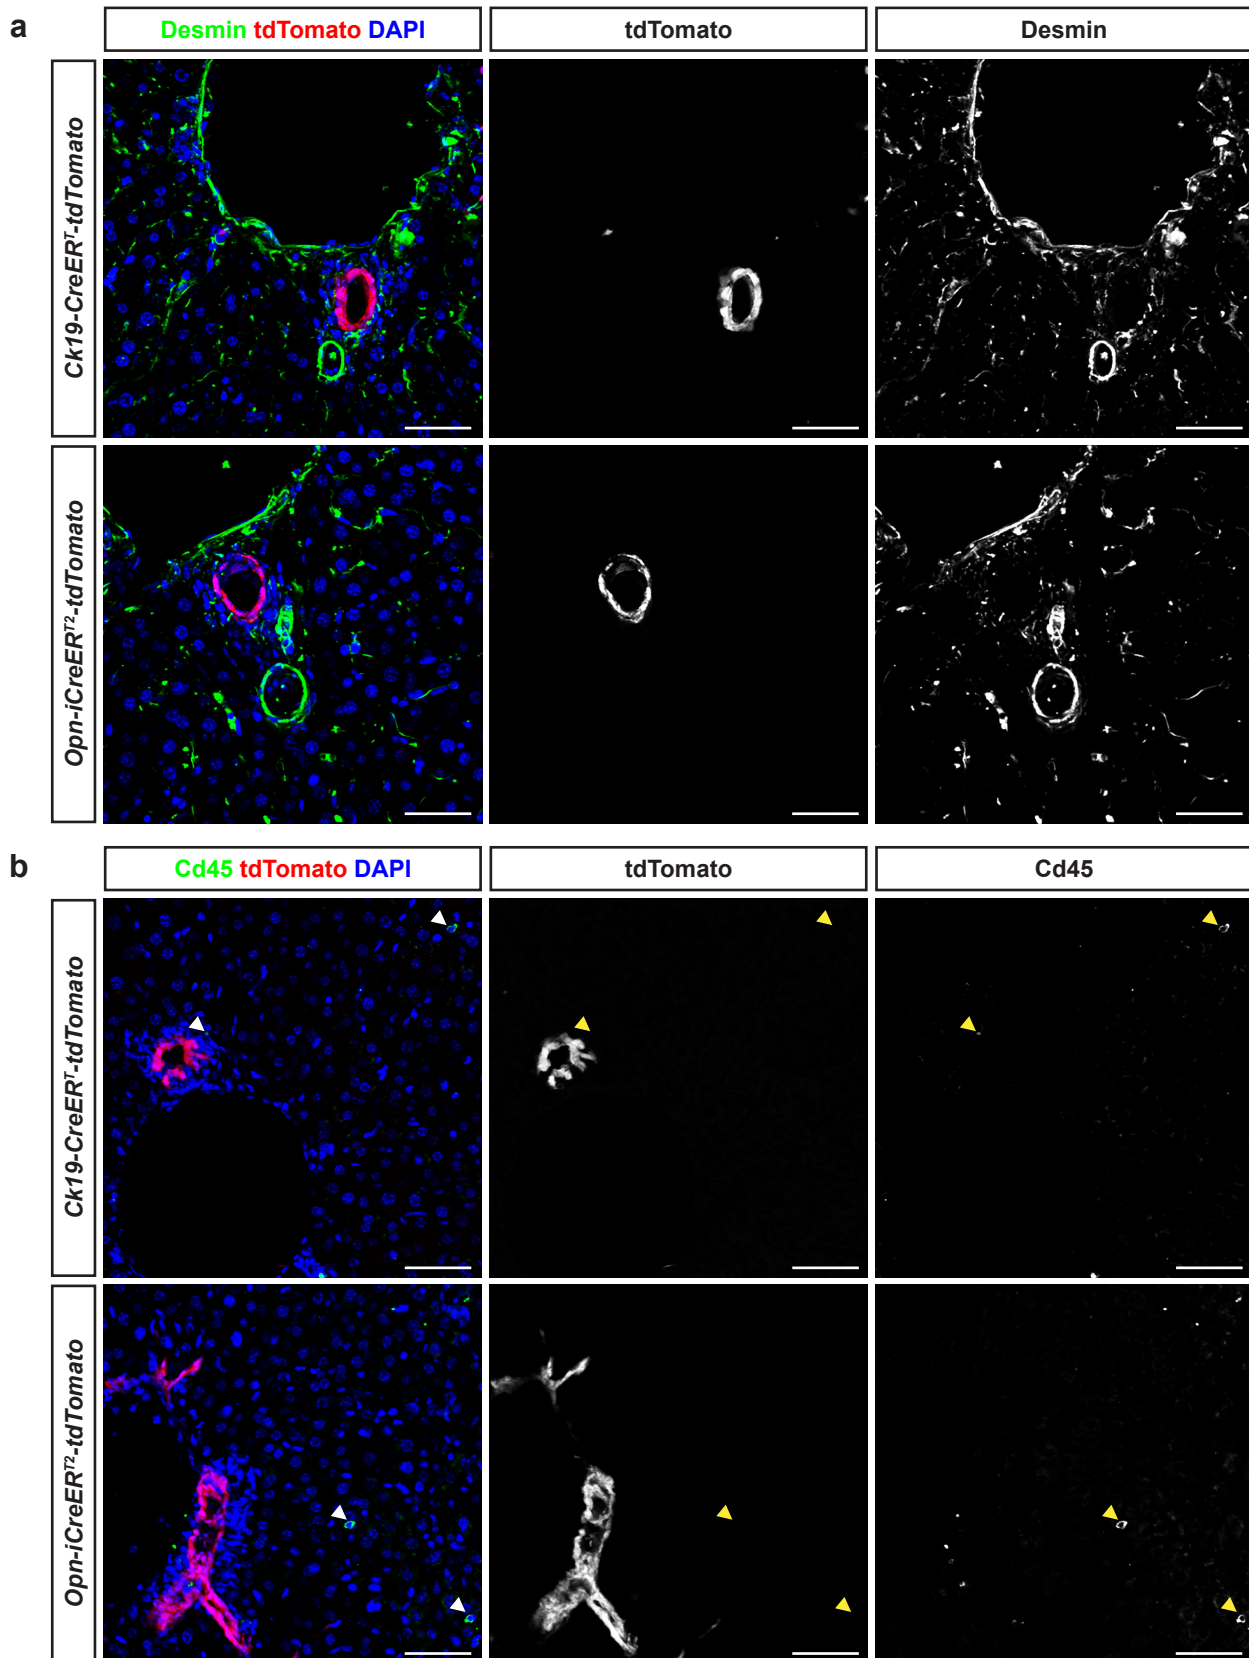

**Figure S5. The Ck19-CreER<sup>T</sup> and Opn-iCreER<sup>T2</sup> drivers do not trigger recombination in hepatic stellate cells or immune cells after liver injury.**

Immunofluorescent detection of Desmin (a) and Cd45 (b) with tdTomato on liver sections of *Ck19-CreER-tdTomato* and *Opn-CreER-tdTomato* mice three days after CCl<sub>4</sub> treatment. Arrow heads indicate Desmin<sup>+</sup> and Cd45<sup>+</sup> cells respectively. Scale bars: 50 μm.
