# Supplementary material for: Comparison of the Opn-CreER and Ck19-CreER Drivers in Bile Ducts of Normal and Injured Mouse Livers
Source: MDPI journal article supplement (doi:10.3390/cells8040380), 2019-04-25
Supplement: s1 [file s1]

untreated

a

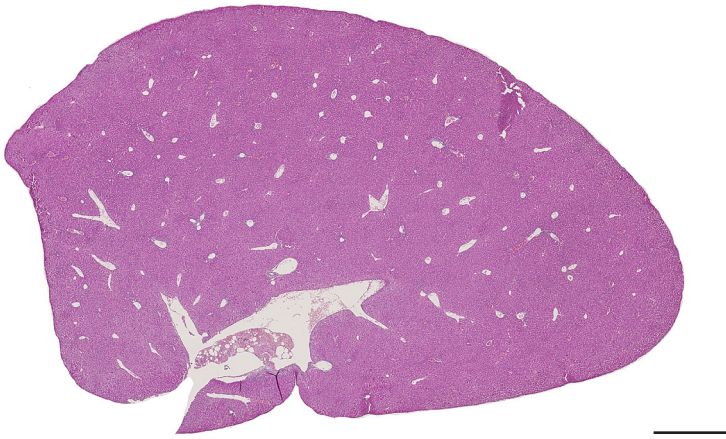

b

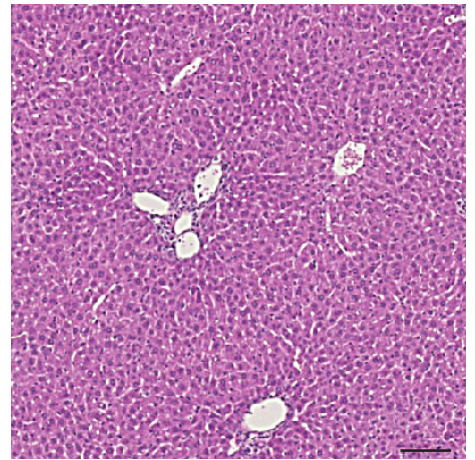

CCl<sub>4</sub> treated

c

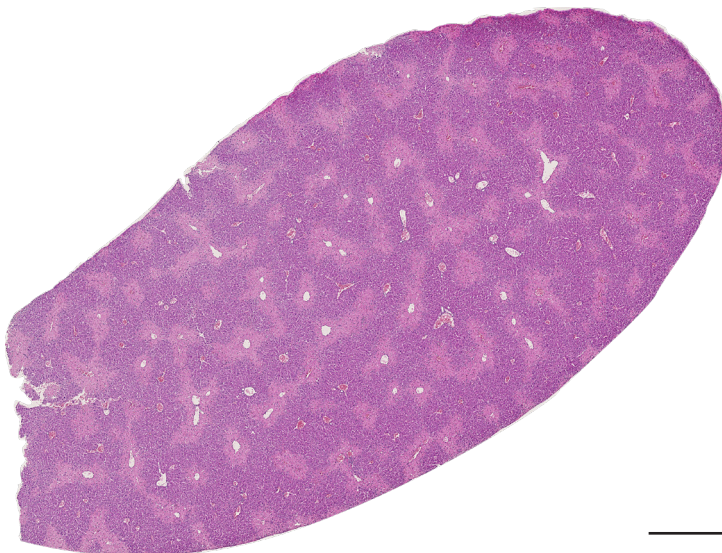

d

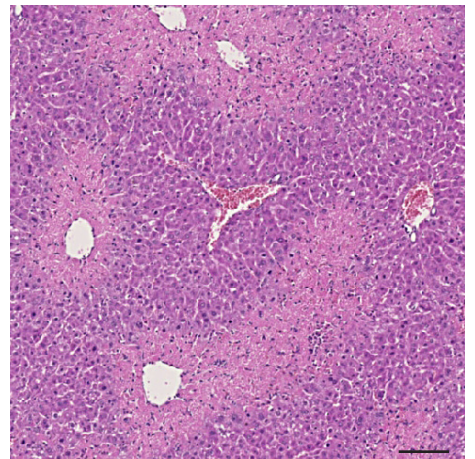

**Figure S4. CCl<sub>4</sub> injection causes necrosis of centrilobular hepatocytes.**

H&E staining on a section of a wildtype untreated liver (a,b) and 48h after CCl<sub>4</sub> injection (c,d). Scale bars (left): 1 mm, scale bars (right): 100  $\mu$ m.
