# Supplementary material for: Comparison of the Opn-CreER and Ck19-CreER Drivers in Bile Ducts of Normal and Injured Mouse Livers
Source: Cells. 2019 Apr 25;8(4):380. doi: 10.3390/cells8040380 (PMC6523626; doi:10.3390/cells8040380)
Supplement: Supplementary file 1 [file cells-08-00380-s001.zip]

Archive with 5 entries (5 files):
- FigS1.pdf
- FigS2.pdf
- FigS3.pdf
- FigS4.pdf
- FigS5.pdf
